# Supplementary material
Source: PubMed Central journal article supplement (PMC1948938)
Supplement: pnas_0702038104_1.pdf [file pnas_0702038104_1.pdf]

# Presenilin

Hs\_PS1\_AAH11729  
Mm\_PS1\_NP\_032969  
Hs\_PS2\_AAP35630  
Mm\_PS2\_NP\_035313  
Dm\_PS\_AAB53369  
Ce\_Sel12\_AAD50991  
Dd\_PS\_EAL61660  
Dd\_PS\_EAL61279  
PP\_PS  
At2g\_NM\_128544  
At1g\_NM\_100743  
Os\_Ps\_BAD81114  
Spe4\_NM\_059694

Hs\_PS1\_AAH11729  
Mm\_PS1\_NP\_032969  
Hs\_PS2\_AAP35630  
Mm\_PS2\_NP\_035313  
Dm\_PS\_AAB53369  
Ce\_Sel12\_AAD50991  
Dd\_PS\_EAL61660  
Dd\_PS\_EAL61279  
PP\_PS  
At2g\_NM\_128544  
At1g\_NM\_100743  
Os\_Ps\_BAD81114  
Spe4\_NM\_059694

Hs\_PS1\_AAH11729  
Mm\_PS1\_NP\_032969  
Hs\_PS2\_AAP35630  
Mm\_PS2\_NP\_035313  
Dm\_PS\_AAB53369  
Ce\_Sel12\_AAD50991  
Dd\_PS\_EAL61660  
Dd\_PS\_EAL61279  
PP\_PS  
At2g\_NM\_128544  
At1g\_NM\_100743  
Os\_Ps\_BAD81114  
Spe4\_NM\_059694

Hs\_PS1\_AAH11729  
Mm\_PS1\_NP\_032969  
Hs\_PS2\_AAP35630  
Mm\_PS2\_NP\_035313  
Dm\_PS\_AAB53369  
Ce\_Sel12\_AAD50991  
Dd\_PS\_EAL61660  
Dd\_PS\_EAL61279  
PP\_PS  
At2g\_NM\_128544  
At1g\_NM\_100743  
Os\_Ps\_BAD81114  
Spe4\_NM\_059694

Hs\_PS1\_AAH11729  
Mm\_PS1\_NP\_032969  
Hs\_PS2\_AAP35630  
Mm\_PS2\_NP\_035313  
Dm\_PS\_AAB53369  
Ce\_Sel12\_AAD50991  
Dd\_PS\_EAL61660  
Dd\_PS\_EAL61279  
PP\_PS  
At2g\_NM\_128544  
At1g\_NM\_100743  
Os\_Ps\_BAD81114  
Spe4\_NM\_059694

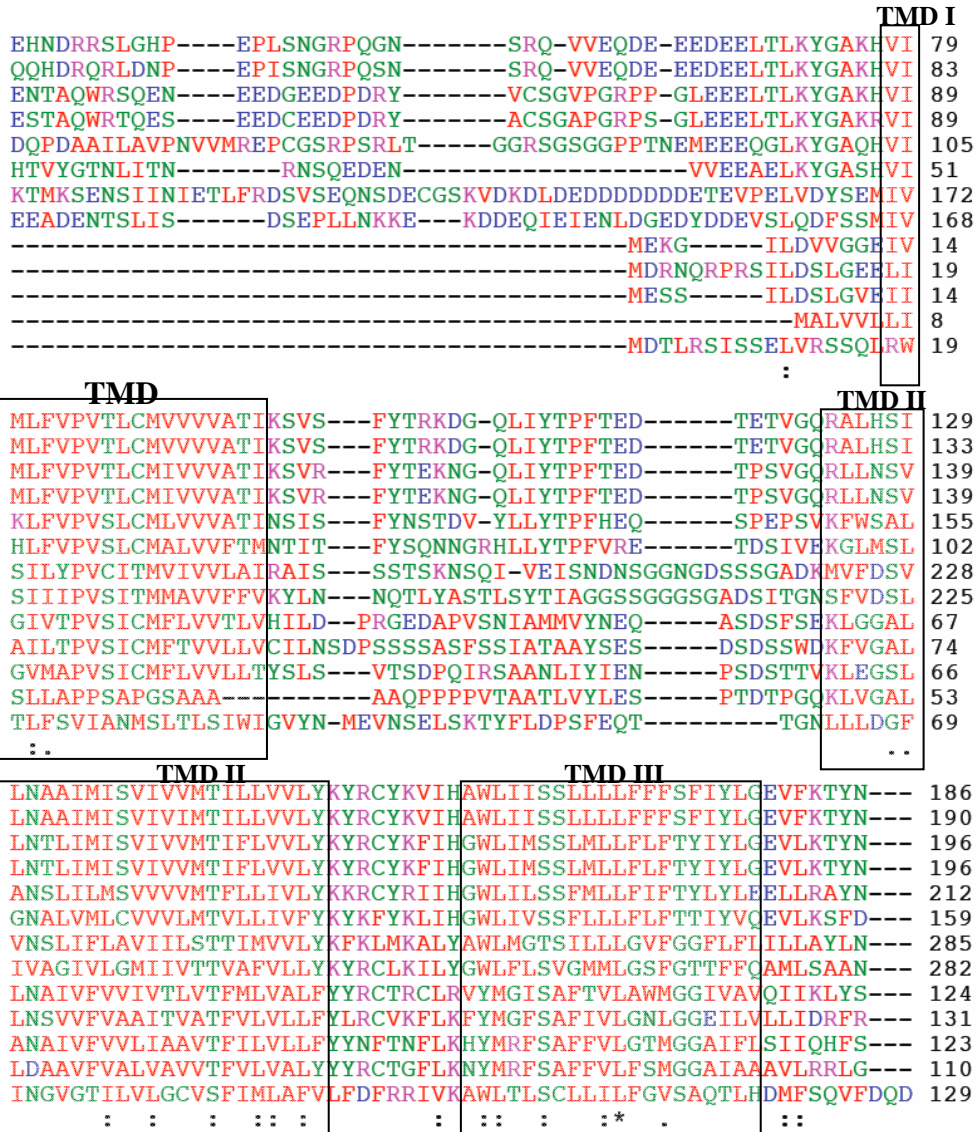

TMD IV

TMD V

TMD VI

Hs\_PS1\_AAH11729 ----VAVDYITVALLIWNFGVVGMSIHWKGLPLRLQQAAYLIMISALMALVFIKYLPEWFT 241  
Mm\_PS1\_NP\_032969 ----VAVDYITVALLIWNFGVVGMSIHWKGLPLRLQQAAYLIMISALMALVFIKYLPEWFT 245  
Hs\_PS2\_AAP35630 ----VAMDYPTLLLTVWNFGAVGMVCIHWKGLPLVLLQQAAYLIMISALMALVFIKYLPEWFS 251  
Mm\_PS2\_NP\_035313 ----VAMDYPTLFLAVWNFGAVGMVCIHWKGLPLVLLQQAAYLIVISALMALVFIKYLPEWFS 251  
Dm\_PS\_AAB53369 ----IPMDYPTALLIMWNFGVVGMSIHWQGLPLRLQQAAYLIVFVAALMALVFIKYLPEWFT 267  
Ce\_Sel12\_AAD50991 ----VSPSALLLVFLGLNGYVGLGMMCIHWKGLPLRLQQAAYLIVFVAALMALVFIKYLPEWFT 214  
Dd\_PS\_EAL61660 ----LGLDYVTFVIVVWNFSVGGIVCIFWYS-PKLLNQGYLISISVLMALFFSR-LPDWT 339  
Dd\_PS\_EAL61279 ----LPLDYITFAFLIFNFTVCGIIGVFWYA-HQYVNOQLYLVIIISVLMALISLIR-LPQWT 336  
PP\_PS ----IPIDVITFLICTINFASVGVAAVFFCRMPIMVTQGYLVIVIGLVAVFWTIK-LPEWT 179  
At2g\_NM\_128544 ----FPIDVITFLILLNFNSVVGVAVFFMSKFSILITQGYLVIVIGLVAVYFFTIL-LPEWT 186  
At1g\_NM\_100743 ----IPVDVITCFILLNFNFTILGTLVSVFAGGIPIVLRQCYMVVMGIVVAAWFTIK-LPEWT 178  
Os\_Ps\_BAD81114 ----APLDAAATALVLLFNASAVGVLSVFFASAVPIVVRQGYMVALAVIVAAWLSR-LPEWT 165  
Spe4\_NM\_059694 DNNQYYMTIVLIVVPTVVYGFGGIYAFSFSNS-SLIHQIFVVTNCSLISVFYLRVPPSKT 188

TMD VI

Hs\_PS1\_AAH11729 AWLILAVISVYDLVAVICPKGPLRMLVETAQERNETLFPALIYSSTMVWLVN----- 293  
Mm\_PS1\_NP\_032969 AWLILAVISVYDLVAVICPKGPLRMLVETAQERNETLFPALIYSSTMVWLVN----- 297  
Hs\_PS2\_AAP35630 AWVILGAVISVYDLVAVICPKGPLRMLVETAQERNEPIFPALIYSSAMVVTVG----- 303  
Mm\_PS2\_NP\_035313 AWVILGAVISVYDLVAVICPKGPLRMLVETAQERNEPIFPALIYSSAMVVTVG----- 303  
Dm\_PS\_AAB53369 AWAVLAAISIWDLIAVILSPRGPLRILVETAQERNEQIIPALIYSSTVVYALVNTVTPQOS 327  
Ce\_Sel12\_AAD50991 VWFVLEVISVWDLVAVITPKGPLRYLVETAQERNEPIFPALIYSSGVIYYPVIVTAVEN- 273  
Dd\_PS\_EAL61660 TWGILSIVSIYDIFAVICPGGPLRILVETAQERNE-NIPAMIYNASIIYIGMIYNEDNLEN 398  
Dd\_PS\_EAL61279 IFTLVIVAIYDLFAVICPRGPKLVLELSQRNE-NIPALVY----- 378  
PP\_PS TWVLLLLAMAAYDVAVITPRGPLNLLGELAIERDE-DIPALIYEAPRTVSGRMQMPSP- 237  
At2g\_NM\_128544 TWVLLVALALYDIAAVILPVGPLRLLVEMAIISRDE-DIPALVYEAPRVIR----- 235  
At1g\_NM\_100743 TWVILVALALYDLVAVILAPGGPLKLLVLELASSRDE-ELPAMVYEAPRTVSSGNQ----- 231  
Os\_Ps\_BAD81114 TWVMLIALALYDLVAVILAPRGPLRMLVLELASSRDD-ELPALVYESRPTVGPASG----- 218  
Spe4\_NM\_059694 TWVFLVIVLFWDLFAVICAPMGPLKVVLEKASDYSKCVLNLIMFSANEKRLTAGSNQEETN 248

Hs\_PS1\_AAH11729 -----MAEGDPEAQR-----RVSKNSKYNAESTERESQ 321  
Mm\_PS1\_NP\_032969 -----MAEGDPEAQR-----RVPKNPKYNTQRAERETQ 325  
Hs\_PS2\_AAP35630 -----MAKLDPSSQG-----ALQLP--YDPEMEE----- 325  
Mm\_PS2\_NP\_035313 -----MAKLDPSSQG-----ALQLP--YDPEMEE----- 325  
Dm\_PS\_AAB53369 -----QATASSSPSSSNTSTTTTRATQNSLASPEAAAASGQ 362  
Ce\_Sel12\_AAD50991 -----TTDPREPTSSDSTSTAFFGAEASCSETPKRPKV 307  
Dd\_PS\_EAL61660 NNNNNNNNNIELNINEVDIENNNNNEDENKNTEDGNNNNNKNNNNNNNNRIENENGA 458  
Dd\_PS\_EAL61279 -----AQMGSDAERPRVRNRASRSSNPSPDTTELGESPMSSGNASQRDSTLT 286  
PP\_PS -----NDSRSVQRVWREQRSSQ-----NNANRN----- 259  
At2g\_NM\_128544 -----RRNRGSSLRALVGGGVSDSGVELQAVRNHDVNQLGRENSHNMDYNA-A 279  
At1g\_NM\_100743 -----SSSYASAMGSEMVQPVADPGRSGGNQYDRVEQEDDSSRAVVE 261  
Os\_Ps\_BAD81114 -----EGEESTIRRTVKQTEIYTTKREAQDDFEYQKIRQRRAINPDSVPTTEHSP 298  
Spe4\_NM\_059694

Hs\_PS1\_AAH11729 DTVAEN-----DDGGFSEWEAQRDHSHLGHPRSTPESRAAVQELSSSIL 365  
Mm\_PS1\_NP\_032969 DSGSGN-----DDGGFSEWEAQRDHSHLGHPRSTPESRAAVQELSGSIL 369  
Hs\_PS2\_AAP35630 DSYDSF-----GEPSEYEFPEPLTGYPG-----EEL----- 352  
Mm\_PS2\_NP\_035313 DSYDSF-----GEPSEYEFPEPLTGYPG-----EEL----- 352  
Dm\_PS\_AAB53369 RTGNSHPRQNQRDDGSLVLAATEAAGFTQEWSANLSEVRARRQIEVQSTQSGNAQRSNEY 422  
Ce\_Sel12\_AAD50991 KRIPQK-----VQIESNTTASTTQNSGVRVERELAAERPTVQDAN----- 347  
Dd\_PS\_EAL61660 ENSSENGSITPPPTIPNFIKDEKELNRSSGSNGFPNFKKCANDNILIGDAETNDEIVSNA 518  
Dd\_PS\_EAL61279 -----ETGKGSDSN----- 387  
PP\_PS AAVDDSQNLITGPPTPEVGIIGSRLISSTGEGGALHAV---SIIHENSMDDDTVPLV 343  
At2g\_NM\_128544 -----EVRVVEAEVEEHVG-----SSERAETSVP LI 287  
At1g\_NM\_100743 IAVRVIDNVDDGIGNSRGGLERSPLVGSPSASEHSTSVGTRGNMEDRESVMDDEMSPLV 339  
Os\_Ps\_BAD81114 RDVGGSSRSSIRERNLEREAPMAVSVSGHSSNQQGSSQHA-----VIQIEQHEEGETVPLV 316  
Spe4\_NM\_059694 LVEAEPSPIELKEKNSTEELSDDSDTSETSSGSSNLSSSDSSTTVSTSDIETAECDDQK 358

TMD VII

Hs\_PS1\_AAH11729 -----AGEDPEERGKVLGGLGDFIFYS 386  
Mm\_PS1\_NP\_032969 -----TSEDPEERGKVLGGLGDFIFYS 390  
Hs\_PS2\_AAP35630 -----EEEEERGKVLGGLGDFIFYS 371  
Mm\_PS2\_NP\_035313 -----EEEEERGKVLGGLGDFIFYS 371  
Dm\_PS\_AAB53369 R-----TVTAPDQNHDPGQEEERGIKVLGGLGDFIFYS 452  
Ce\_Sel12\_AAD50991 -----FHRHEEEERGKVLGGLGDFIFYS 369  
Dd\_PS\_EAL61660 E-----SSIDSTISESYVKPKQSIKVLGGLGDFVFYS 548  
Dd\_PS\_EAL61279 -----LKLGLGDFIFYS 399  
PP\_PS QQQTNSPSSPATLGRSEAEFDRHSRPMNGATQHSLEDGDEETGIGLSGAIKVLGGLGDFVFYS 403  
At2g\_NM\_128544 DRRPEQ-----AENSETFLEGIKGLSSGAIKVLGGLGDFIFYS 323  
At1g\_NM\_100743 ELMGWGDNREE-----ARGLEESDNVVDISNRG-IKVLGGLGDFIFYS 379  
Os\_Ps\_BAD81114 SAASANNAAPNEHR-----ENSSDSEMGEMFESTRGIKVLGGLGDFIFYS 362  
Spe4\_NM\_059694 EWDDLVSNLPS-----NNDKRPTAADALNDGEVLKVLGGLGDFVFYS 399

: : : : \* : \* : \* : \* : \* :

|                   | TMD VII            | TMD VIII                | TMD IX                   |     |
|-------------------|--------------------|-------------------------|--------------------------|-----|
| Hs_PS1_AAH11729   | VLVGKASATASGDWNTT  | IACFVAILIGLCLTLLLLLAI   | FKKALPALPISITFGLVIFYFATD | 446 |
| Mm_PS1_NP_032969  | VLVGKASATASGDWNTT  | IACFVAILIGLCLTLLLLLAI   | FKKALPALPISITFGLVIFYFATD | 450 |
| Hs_PS2_AAP35630   | VLVGKAAATGSGDWNTT  | LACFVAILIGLCLTLLLLLAV   | FKKALPALPISITFGLIFIFYSTD | 431 |
| Mm_PS2_NP_035313  | VLVGKAAATGNGDWNTT  | LACFIAIILIGLCLTLLLLLAV  | FKKALPALPISITFGLIFIFYSTD | 431 |
| Dm_PS_AAB53369    | VLVGKASS--YGDWTTT  | IACFVAILIGLCLTLLLLLAI   | WRKALPALPISITFGLIFCFATS  | 510 |
| Ce_Sel12_AAD50991 | VLLGKASS--YFDWNTT  | LACYVAILIGLCLTLLVLLAV   | KRALPALPISIFSGLIIFYFCTR  | 427 |
| Dd_PS_EAL61660    | VLLGKAAS---YQITTV  | FTVFIAITGLFLTLLILLAV    | RRALPALPMSIIFGIIVFFLTF   | 605 |
| Dd_PS_EAL61279    | LLISRAAL---YHMSCV  | FSTFIAITGLFLTLLCLAIF    | FKKALPALPISIFLGILFYLSN   | 456 |
| PP_PS             | VLVGRAAM---YDLMTV  | YACYLAIIVAGLGATLILLAV   | QRALPALPISISLGVIFYFLAR   | 460 |
| At2g_NM_128544    | VLVGRAAM---YDLMTV  | YACYLAI IAGLGITLMLLSVY  | QKALPALPVSIMLGVVIFYFLAR  | 380 |
| At1g_NM_100743    | VLVGRAAM---YDLMTV  | YACYLAI ISGLGCTLILLSVY  | NRALPALPISIMLGVVIFYFLTR  | 436 |
| Os_Ps_BAD81114    | VLVGRAAM---YDLMTV  | YACYLAI IAGLGCTLILLSSIC | KHALPALPISILLGVTFYFLTR   | 419 |
| Spe4_NM_059694    | LLIGQAAAS--GCPFAVI | SAALGILFGLVVTLTVFST     | ESTTPALPLPVICGTFCYFSSM   | 457 |

:.:.: \* : . : : \* : \* \* : : . : \* \* \* : : \* : :

|                   | TMD IX             |     |
|-------------------|--------------------|-----|
| Hs_PS1_AAH11729   | YLVQPFMDQLAFHQFYI  | 463 |
| Mm_PS1_NP_032969  | YLVQPFMDQLAFHQFYI  | 467 |
| Hs_PS2_AAP35630   | NLVRPFMDTLASHQLYI  | 448 |
| Mm_PS2_NP_035313  | NLVRPFMDTLASHQLYI  | 448 |
| Dm_PS_AAB53369    | AVVKPFMEDLSAKQVFI  | 527 |
| Ce_Sel12_AAD50991 | WIITPFVTVQVSQKCLLY | 444 |
| Dd_PS_EAL61660    | KILIQYLYFLGENQIFV  | 622 |
| Dd_PS_EAL61279    | NFLTFFIEALTLSQIFV  | 473 |
| PP_PS             | LVMDPFVLDMSTNLVFF  | 477 |
| At2g_NM_128544    | LLLEVFVVCSSNLVMF   | 397 |
| At1g_NM_100743    | LLMEPFVGVTTNLMF    | 453 |
| Os_Ps_BAD81114    | LLMEPFVGSSTNLVMF   | 436 |
| Spe4_NM_059694    | FFWEQLYG-----      | 465 |

## PEN-2

|                     |                                                             |    |
|---------------------|-------------------------------------------------------------|----|
| HsPEN2_NP_758844    | -----MNLERSVNEEKLNLCR                                       | 16 |
| MmPEN2_NP_079774    | -----MNLERSVNEEKLNLCR                                       | 16 |
| DmPEN_AAM88323      | -----MNIKAPNPKLELCR                                         | 16 |
| CePEN2_NP_499459    | -----MDISKLTDVKKVDLCK                                       | 16 |
| DdPEN2_XP_629118    | -----                                                       |    |
| AtPEN2_Q9FY84       | MEATRSDDPS--LNPIRNRNPNPNPNPLSTIIS--AQVWPTIDGPLGLTEEASVDYAR  | 57 |
| OsPEN2_NM_001051998 | MAERVAGVPEDEESGLLRPSAAGRRRPSVAAARRAPPPVWATVDGPLGLPLEEAEGHAR | 60 |
| PpPEN2              | MAEVEVN-----RRDMEAGESPALTSAALGL--HYWPTIDGPLGVYHEEAVNLAK     | 48 |

|                     | TMD I                    | TMD II                    |               |     |
|---------------------|--------------------------|---------------------------|---------------|-----|
| HsPEN2_NP_758844    | KY YLGGFAFLPFLWLWNIFWFF  | REAF LVP---AYTEQSQIKGYVWR | AVGFLFWVIVLT  | 72  |
| MmPEN2_NP_079774    | KY YLGGFAFLPFLWLWNIFWFF  | REAF LAP---AYTEQSQIKGYVWR | AVGFLFWVILA   | 72  |
| DmPEN_AAM88323      | KY FFAGFAFLPFVWAINVCWFF  | TEAFHKP---PFSEQSQIKRYVIYS | AVGTLFWLIVLT  | 72  |
| CePEN2_NP_499459    | KY FLIGACFLPLVWIVNTFWFF  | SDAFCKP---INAHRRQIRKYVIAS | IVGSIFWIIVLS  | 72  |
| DdPEN2_XP_629118    | -----LTWVWLINILYFIP      | --YRNS---LN---DKVKWYLFKS  | LIGFLGYSTIFM  | 42  |
| AtPEN2_Q9FY84       | RFYKFGFALLPWLWFVNCYFWP   | -VLR-----HSRAPPQIRNYVVR   | AI GFSVFTALLS | 110 |
| OsPEN2_NM_001051998 | RF FLWGFAFLPFLWAINCCYFWP | -VLRSPATFPSSAAFSTRIRPVVVR | AI GFTIFS VLL | 119 |
| PpPEN2              | SFYVYVGLCLPWLWFINCLYFIP  | -VLR-----NSRSDPLIRPVVKS   | GIGFLVCGSLLL  | 101 |

|                     | TMD II                                                       |     |
|---------------------|--------------------------------------------------------------|-----|
| HsPEN2_NP_758844    | SWITIFQIYRPRWG--ALGDYLSFTIPLGTP-----                         | 101 |
| MmPEN2_NP_079774    | TWITIFQIYRPRWG--ALGDYLSFTIPLGTP-----                         | 101 |
| DmPEN_AAM88323      | AWIIFQTNRTAWG--ATADYMSFIPLGSA-----                           | 101 |
| CePEN2_NP_499459    | AWEIFFQHYRAQGL--VWTDPLTFVFPTGRV-----                         | 101 |
| DdPEN2_XP_629118    | GWMGIYLVNRNKWG--AFGDDISITIPFG-----                           | 69  |
| AtPEN2_Q9FY84       | AWALTFSIGGEQLFGPLYDKLVMYNVADR-----                           | 139 |
| OsPEN2_NM_001051998 | TWATTFIIGGERLFGPNLDLVMYNVADK-----                            | 148 |
| PpPEN2              | SWALTFAYGGEGLLGPSWKHLAVYDIANKYQQYPCNLDSGIILIRNDVTCSFVCHLTWHF | 161 |

|                     |                                                       |     |
|---------------------|-------------------------------------------------------|-----|
| HsPEN2_NP_758844    | -----                                                 |     |
| MmPEN2_NP_079774    | -----                                                 |     |
| DmPEN_AAM88323      | -----                                                 |     |
| CePEN2_NP_499459    | -----                                                 |     |
| DdPEN2_XP_629118    | -----                                                 |     |
| AtPEN2_Q9FY84       | -----LGLSGLA-----                                     | 146 |
| OsPEN2_NM_001051998 | -----LGISGFMG-----                                    | 156 |
| PpPEN2              | PLARRRPNLSIDHYTAYRVSCRDRSEWCWPSEILMADLCLHCGDCALKQYPVG | 215 |



|                    |                                                              |     |
|--------------------|--------------------------------------------------------------|-----|
| HsNct_BC047621     | NISGVVLADHSGAFHNKYYQSIYDTAENINVSYPEWLSPEEDLNFV-----TDTAKA    | 466 |
| MmNct_NM_021607    | NISGVVLADHSGSFHNRYQSIYDTAENINVYPEWQSPEEDLNFV-----TDTAKA      | 485 |
| AtNct_Q8GUM5       | QTSAVVLEDFDTNFVNKFYHSHLDDLINSSS---VVAAASVVAR-----TLYILA      | 463 |
| OsNct_NM_001054589 | STPGLVLEDFDSQFSNRFYHSTLDGPANVNSSS---IAAAAALIAR-----SLYILA    | 460 |
| PpNct              | TVAGVVIIEFDTAFTNKYYNSVDDNSSNVNLPSS---LVVAASLVAR-----SLVLLA   | 441 |
| DmNct_NM_143040    | NFNALILNARP---TNKYYHSIYDDADNVDFTYANTSKDFTQLTEVNDPKSLNPDSLQMK | 486 |
| CeNct_NM_060311    | HVQSVLLAPYGKEYEYQVRVNSILDKNEWTEDEKAIQEIEAV-----STAILA        | 503 |
|                    | : : : : * * :                                                |     |

|                    |                                                               |     |
|--------------------|---------------------------------------------------------------|-----|
| HsNct_BC047621     | LADVATVLGRALYELAGGTNFSDTVQADPQTVTRLLYGFLIKANNSWFQSILRQDLRSYL  | 526 |
| MmNct_NM_021607    | LANVATVLARALYELAGGTNFSSSIQADPQTVTRLLYGFLVKANNSWFQSILKHDLRSYL  | 545 |
| AtNct_Q8GUM5       | SDN-KDTSNSALGSIHVNASFVEELLTCLLACEPGLSCNLVKDYISPTNTCPGNYAGVQ   | 522 |
| OsNct_NM_001054589 | SAD-LPIDLITLNTIKVNVSLVEELIGCLLKCDPGLSCGIVKSFISPSNSCPSHYVGFQ   | 519 |
| PpNct              | SDNNLRFDSPIFESIQVNMVSLVEEMVNCFFGTSPGMRCSLVESLMTASHDVANHYVGFQ  | 501 |
| DmNct_NM_143040    | VRNVSSIVAMALYQITITGKEYTGTQVANPLMADEFYLCFLQSADCPFKAAAS-YPGSQLT | 545 |
| CeNct_NM_060311    | AAADYVGVETDEVVAKVKDKLITTFIDCLITSNFWDCCDFMQKLDGGRYHKLFSNYGFNQ  | 563 |
|                    | : : :                                                         |     |

|                    |                                                               |     |
|--------------------|---------------------------------------------------------------|-----|
| HsNct_BC047621     | GDGPLQHYIAVSSPTNTTYVQYALANLTGTVVNLTREQCQDPSKVPSENKDLYEYSWVQ   | 586 |
| MmNct_NM_021607    | DDRPLQHYIAVSSPTNTTYVQYALANLTGKATNLTREQCQDPSKVPNESKDLYEYSWVQ   | 605 |
| AtNct_Q8GUM5       | GEPSSKP--YLGVDVSRFLWNFLADKTSVQKGNNTSVCCKGVCCKTDEVCIKAESNKE    | 580 |
| OsNct_NM_001054589 | DLPAGTQ--FPSYADDISRFIWNFLADRTSSLAGNSSSCT--GQCHDEGEICVGAVEVEG  | 575 |
| PpNct              | ADPSVSPNSMPEVIDDTTRFVWVNFADRTALPREDLHEKCT-LVCKNPDEVCVGTQSQL   | 560 |
| DmNct_NM_143040    | NLPPMRYISVLLGGSQESSGYTYRLLGYLLSQLQPDHRDN-----CTDLPLHYFAGFNSI  | 600 |
| CeNct_NM_060311    | KSTYISMESHATAFPTVLHHLTIFALGSDKETLNVKSEKSCS--HLGQFQAFQMYTYTWQP | 621 |
|                    | * .                                                           |     |

|                    |                                                                |     |
|--------------------|----------------------------------------------------------------|-----|
| HsNct_BC047621     | GPLHSNETDRLPR-CVRSTARLARALSPAFELSQWSSSTEYSTWTESRWKDIHARIFLIAS  | 645 |
| MmNct_NM_021607    | GPWNSNRTERLPQ-CVRSTVRLARALSPAFELSQWSSSTEYSTWAESRWKDIQARIFLIAS  | 664 |
| AtNct_Q8GUM5       | GTCVVSTTRYVPAYSTRLLKYNDGAWTILPQNSSDSMGMPVDPVWTESNWDTLRVHVYTVQH | 640 |
| OsNct_NM_001054589 | GRCVVSTTRYVPAYSTRLLKFEDNVHVLVNVSSDPFSAADPVWTESFWNTIGLRVYAVQA   | 635 |
| PpNct              | GQCRVSTRYVPAYSPRLKFHDYWWQLLPLEAGDKMGADPVYTESFWNSISIRSYQKED     | 620 |
| DmNct_NM_143040    | GECRLTTQN-----YSHALSPAFLIDGYDWSSGMYSTWTESTWSQFSARIFLRPS        | 650 |
| CeNct_NM_060311    | NPYTGNFSCLSKSAIVKVMVSPAVDSQTP---EEMNTRYSTWMESVYIIIESVNLVLMED   | 678 |
|                    | : . . . : * * :                                                |     |

|                    |                                                |     |
|--------------------|------------------------------------------------|-----|
| <b>TMD</b>         |                                                |     |
| HsNct_BC047621     | KELEFLITLVVGFILIFSLIVTYCINA KADVLFIAPREPGAVSY- | 689 |
| MmNct_NM_021607    | KELEFITLVVGFILIFSLIVTYCINA KADVLFVAPREPGAVSY-  | 708 |
| AtNct_Q8GUM5       | SAYDNAVLVAGITVTTLAYIGILAAKSIITKALKQD-----      | 676 |
| OsNct_NM_001054589 | TSYDNLVLLIGIITVASYFAVIVGRSYISKIIRKRD-----      | 671 |
| PpNct              | SWYELILIFIGVFTFVSILSITCSTSLLRKRLKRA-----       | 656 |
| DmNct_NM_143040    | NVHCVTTLVSVGIVVLIISFCLVYIISSRSEVLFDLPASNAALFG  | 695 |
| CeNct_NM_060311    | ASFFYTMILIAVISALLSIFAVGRCSSETTFIVDEGEPAEEGGEPL | 723 |
|                    | : : .. :                                       |     |

### Aph-1

|                       |                                                       |               |    |
|-----------------------|-------------------------------------------------------|---------------|----|
|                       | <b>TMD I</b>                                          | <b>TMD II</b> |    |
| HsAph1a1 NP_001071096 | MGA AVFFGCTFVAFGPAFALFLITVAGDPLRVIILVAGAPFWLVSLLLAS   |               | 50 |
| MmAph1a1 AAH24111     | MGA AVFFGCTFVAFGPAFSLFLITVAGDPLRVIILVAGAPFWLVSLLLAS   |               | 50 |
| MmAph1a NP_666216     | MGA AVFFGCTFVAFGPAFSLFLITVAGDPLRVIILVAGAPFWLVSLLLAS   |               | 50 |
| HsAph1a NP_057106     | MGA AVFFGCTFVAFGPAFALFLITVAGDPLRVIILVAGAPFWLVSLLLAS   |               | 50 |
| MmAph1c NP_080950     | MTL PVFVGFCAFIAFGPAFALYFTIATDPLRVIFLIAGAPFWLVSLLLSS   |               | 50 |
| MmAph1b NP_808251     | MTA AVFFGCAFIAFGPAFALYFTIATDPLRVIFLIAGAPFWLVSLLLSS    |               | 50 |
| HsAph1b_Q8WW43        | MTA AVFFGCAFIAFGPAFALYFTIATEPLRVIIFLIAGAPFWLVSLLLSS   |               | 50 |
| DmAph1 NM_134866      | MTL PEFVGFCTFIAFGPPFALFVFTIANDPVRVILIIIAAFAFWLVSLLLSS |               | 50 |
| P. patens Aph-1       | MGV VVGLGYFLIALGPALTIFSS IAPKPFLLTTLVLSALYLVSLVAAA    |               | 50 |
| P. patens Aph-1a      | MGL VAGFGYFLIALGPALTIFGSS VAPKPFLLTTLVLSALVWLASLNIAA  |               | 50 |
| AtAph1_Q8L9G7         | MTVAAGIGYALVALGPAFSLFVSVISRKPFLLTTLVLSALVWLASLNIAA    |               | 50 |
| OsAph1 NM_001053062   | MTVAAGIGYALVALGPAFSLFAGVVARKPFLLTTLVLSALVWLASLNIAA    |               | 50 |
| CeAph1 NM_060068      | MGY LLTIACYIASFSPSIALFCSFIAHDPVRVILFLLGSPFWLVSLFFSS   |               | 50 |
|                       | * : : : : * . : : : : * * :                           |               |    |

HsAPH1a1\_NP\_001071096  
MmAph1a1\_AAH24111  
MmAph1as\_NP\_666216  
HsAph1as\_NP\_057106  
MmAph1c\_NP\_080950  
MmAph1b\_NP\_808251  
HsAph1b\_Q8WW43  
DmAph1\_NM\_134866  
P.patens Aph-1  
P.patens Aph-1a  
AtAph1\_Q8L9G7  
OsAph1\_NM\_001053062  
CeAph1\_NM\_060068

TMD II

VVWFILVHVVTDRSDARLQYGLLIFGAAVSVLL  
VVWFILVHVVTDRSDARLQYGLLIFGAAVSVLL  
VVWFILVHVVTDRSDARLQYGLLIFGAAVSVLL  
VVWFILVHVVTDRSDARLQYGLLIFGAAVSVLL  
MFWFLVRVITNNRDESQNYLLIFGALLSVCI  
VFWFLVRVITNNRDGPVQNYLLIFGVLLSVCI  
LVWFMARVIIDNKDGPTQYKYLIFGAFVSVYI  
-LWYALIPLKE-----FLAFGVVFSVCF  
IIVWRAFPLGPGS-----WVFLMLLATAVFI  
IIVWRAFPLGPGS-----WVFLMLLATAVFI  
GLWRPFLPLKANV-----WWPYALLVITSVCF  
GIWRVFLPIRSGA-----WWPYAILLITSVAF  
LAWLGLSTVLPDPT-----FLLSLTVCIIA

TMD III

QEVFRFAYYKLLKKADEG 100  
QEVFRFAYYKLLKKADEG 100  
QEVFRFAYYKLLKKADEG 100  
QEVFRFAYYKLLKKADEG 100  
QELFRLAYYKLLKKADEG 100  
QELFRLAYYKLLKKADEG 100  
QEMFRFAYYKLLKKADEG 100  
QEAFRYIIYRILRSTEQG 90  
QEVTRIFYWRFFLKTEKY 92  
QEAFRLLYWHLYFLKIEKY 92  
QEGRLFLFWKYYKRLLEDV 95  
QEGIRLVFWRLYKKMEEM 95  
QELSRYAYFMLLKKAQRG 92

\* : : \*

TMD IV

HsAPH1a1\_NP\_001071096  
MmAph1a1\_AAH24111  
MmAph1as\_NP\_666216  
HsAph1as\_NP\_057106  
MmAph1c\_NP\_080950  
MmAph1b\_NP\_808251  
HsAph1b\_Q8WW43  
DmAph1\_NM\_134866  
P.patens Aph-1  
P.patens Aph-1a  
AtAph1\_Q8L9G7  
OsAph1\_NM\_001053062  
CeAph1\_NM\_060068

LASLS-----EDGRSPISIRQMAVVSGLSFGIISGVFVSVINILADA  
LASLS-----EDGRSPISIRQMAVVSGLSFGIISGVFVSVINILADA  
LASLS-----EDGRSPISIRQMAVVSGLSFGIISGVFVSVINILADA  
LASLS-----EDGRSPISIRQMAVVSGLSFGIISGVFVSVINILADA  
LKSIN-----PEEDIAPSMRLLAYVSGLGFIMSGVFSFVNTLSNS  
LKSIN-----PEE-TAPSMRLLAYVSGLGFIMSGVFSFVNTLSNS  
LKSIN-----PGE-TAPSMRLLAYVSGLGFIMSGVFSFVNTLSDS  
LHAVA-----EDTRVTDNKHILAYVSGLGFIIISGMFALVNVLADM  
LNVLAVK-----LSKPQLNFVDRLEVSFGSGVGHGVAHAIFFGLSIIAPA  
LNVLATK-----LSKPQCNYLDRLEIALASGVGHGLAHAVFFGLSIIAPA  
LDSFADR-----ISRPRFLTDKLIQIALAGGLGHGVAHAVFFCLSLLTTPA  
LDSFADR-----ISKPRCLTDKMLISLAGGLGHGVAHAVFFCLSLLTTPA  
LNKTIHQGQISVAPGVSDLNARHMLALVCGLMGMVISALFYTMNAFAIF

141  
141  
141  
141  
141  
140  
140  
131  
137  
137  
140  
140  
142

\* . : \*

:: \* : \* : \* : \* : \*

HsAPH1a1\_NP\_001071096  
MmAph1a1\_AAH24111  
MmAph1as\_NP\_666216  
HsAph1as\_NP\_057106  
MmAph1c\_NP\_080950  
MmAph1b\_NP\_808251  
HsAph1b\_Q8WW43  
DmAph1\_NM\_134866  
P.patens Aph-1  
P.patens Aph-1a  
AtAph1\_Q8L9G7  
OsAph1\_NM\_001053062  
CeAph1\_NM\_060068

TMD IV

LPGGVVGIH-----GDSPIYFLTSAFLTAAILLHTFPWGVVFFD  
LPGGVVGIH-----GDSPIYFLTSAFLTAAILLHTFPWGVVFFD  
LPGGVVGIH-----GDSPIYFLTSAFLTAAILLHTFPWGVVFFD  
LPGGVVGIH-----GDSPIYFLTSAFLTAAILLHTFPWGVVFFD  
LPGGTVGIH-----GDSPIYFLTSAFLTAAILLHTFPWGVVFFD  
LPGGTVGIH-----GDSPIYFLTSAFLTAAILLHTFPWGVVFFD  
LPGGTVGIH-----GDSPIYFLTSAFLTAAILLHTFPWGVVFFD  
LPGGTVGIH-----GDSPIYFLTSAFLTAAILLHTFPWGVVFFD  
SGPGTMGLK-----GGTELFFVTSAAQALSIIILLHTFWSVIFFN  
FGPATYYTE-----SCKEMFFFLVSALLTLAFLFLHTFSMVIAFN  
FGPATYYTS-----SCKQMPFLVLSALSSLAFFLLHTFSMVIAFN  
FGPATFYVE-----RCSKVFFLISAIIALAFVTHHTFSMVIAFE  
FGRATFYVE-----KCSRMFFFLVSAIISLGLFLVIHTFSMVIAFN  
SGPGTIGLPNALKTGEIDTNRAGKYLPLCYTLSAILLTLFHVWTWTIMVWD

TMD V

180  
180  
180  
180  
180  
179  
179  
170  
177  
177  
180  
180  
192

\* . :

HsAPH1a1\_NP\_001071096  
MmAph1a1\_AAH24111  
MmAph1as\_NP\_666216  
HsAph1as\_NP\_057106  
MmAph1c\_NP\_080950  
MmAph1b\_NP\_808251  
HsAph1b\_Q8WW43  
DmAph1\_NM\_134866  
P.patens Aph-1  
P.patens Aph-1a  
AtAph1\_Q8L9G7  
OsAph1\_NM\_001053062  
CeAph1\_NM\_060068

TMD VI

ACERRRYWALGLVV-----GSHLLTSGLTFLNP---WYEASLLPIYAVTV  
ACERRRYWALGLVV-----GSHLLTSGLTFLNP---WYEASLLPIYAVTV  
ACERRRYWALGLVV-----GSHLLTSGLTFLNP---WYEASLLPIYAVTV  
ACERRRYWALGLVV-----GSHLLTSGLTFLNP---WYEASLLPIYAVTV  
GCEKNKWYTLTLTVL-----LTHLVVSTQTFLSP---YYEVLVNTAYIIMV  
GCEKNKWYTLTLTVL-----LTHLVVSTQTFLSP---YYEVLVNTAYIIMV  
GCEKKKWGILLIVL-----LTHLLVSAQTFISS---YGINLASAFIILV  
AFDTNNYIHIGYVV-----FSHLFVSLITILNAN-ELYTTLILINYLVTI  
AYTHGVGSQKLFV-----VMHLGASFLTILNLLPNGCIVGVPLVFLCTL  
AYTYDNIISQKLFV-----IMHLGAALLTIVNLLPNGCTAGVPLVFLCTA  
GYAKGNKVDQIIVP-----VIHLTAGMLTIVNFASEGCVIGVPLLYLVAS  
GYDERKHSQVFP-----VVHLIASVMTILNLPAGGCVIGTPLLCCVMGA  
SCHKIGRIPSAFVPGAAVVSHELLVTFLLSSLNRS-GFHVLVFAVQFLILL

TMD VII

222  
222  
222  
222  
222  
221  
221  
214  
222  
222  
225  
225  
241

\* : : \*

HsAPH1a1\_NP\_001071096  
MmAph1a1\_AAH24111  
MmAph1as\_NP\_666216  
HsAph1as\_NP\_057106  
MmAph1c\_NP\_080950  
MmAph1b\_NP\_808251  
HsAph1b\_Q8WW43  
DmAph1\_NM\_134866  
P.patens Aph-1  
P.patens Aph-1a  
AtAph1\_Q8L9G7  
OsAph1\_NM\_001053062  
CeAph1\_NM\_060068

TMD VII

SMGLWAFITAGGSLRSIQRSLLCRRQEDSRVMVYSALRIPPED-----  
SMGLWAFITAGGSLRSIQRSLLCRRQEDSRVMVYSALRIPPED-----  
SMGLWAFITAGGSLRSIQRSLLCCKD-----  
SMGLWAFITAGGSLRSIQRSLLCCKD-----  
LMGIWAFYVAGGSCRSCLKCLLQDKD---FLLYNQRSR-----  
LMGIWAFYVAGGSCRSCLKCLLQDKD---FLLYNQRSR-----  
LMGTWAFLAAGGSCRSLLKCLLQDKN---FLLYNQRSR-----  
LTGVLAFRVAGGTSRSFRKFTCQ-----  
VTMVYGDRIWENTDPNFLNHSSLQSMHSGSSL-----  
LTMAYGGKIVHNLGPHSLHHGYLHSPQSGSSL-----  
LTLVHCGKMVWQ-----RLLESRNQSSASR-----  
VTLQYCWQMVWR-----RLSEQHRQFSS-----  
ICIAVCNVIMGTISSFVNGIGQSITDAVTLKQVRTLIEERKLRTQRQSV

265  
265  
247  
247  
258  
257  
257  
238  
255  
255  
250  
249  
291

\* : : \*

HsAPH1a1 NP 001071096

MmAph1a1\_AAH24111

MmAph1as NP 666216

HsAph1as NP 057106

MmAph1c NP 080950

MmAph1b NP 808251

HsAph1b\_Q8WW43

DmAph1 NM 134866

P.patens Aph-1

P.patens Aph-1a

AtAph1\_Q8L9G7

OsAph1 NM 001053062

CeAph1 NM 060068

-----

-----

-----

-----

-----

-----

-----

-----

-----

-----

-----

-----

PDEPMT<sup>R</sup>ERAGTSNTVNA 308
