# Supplementary material
Source: PubMed Central journal article supplement (PMC1948938)

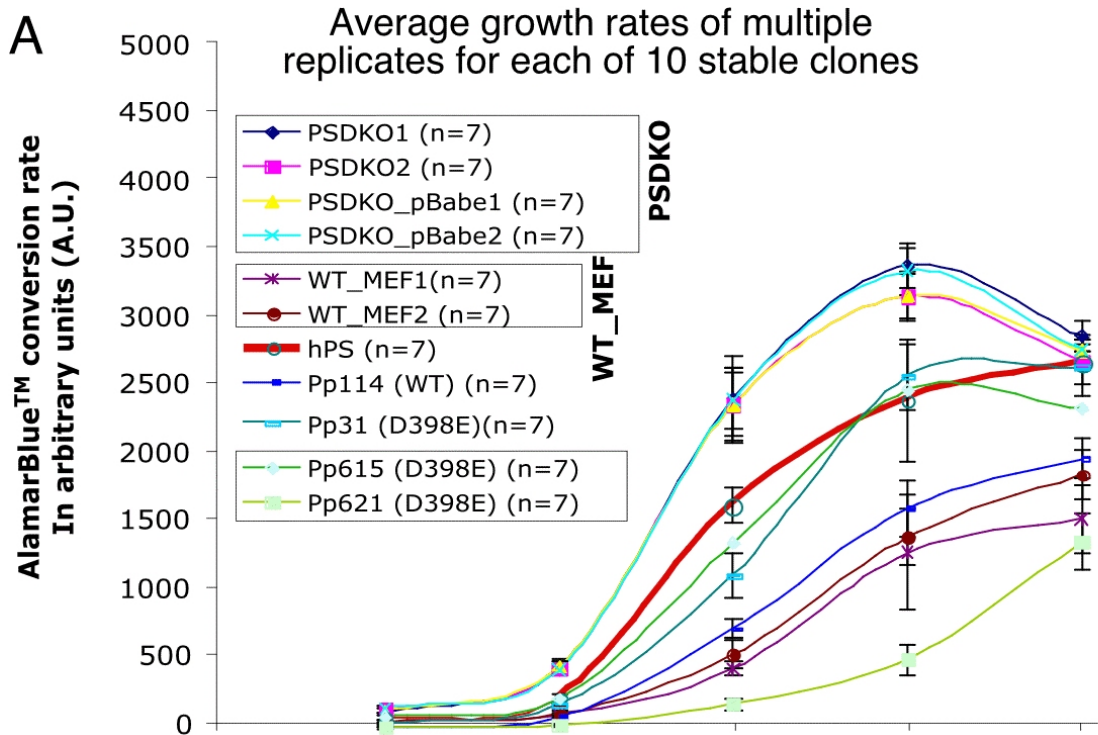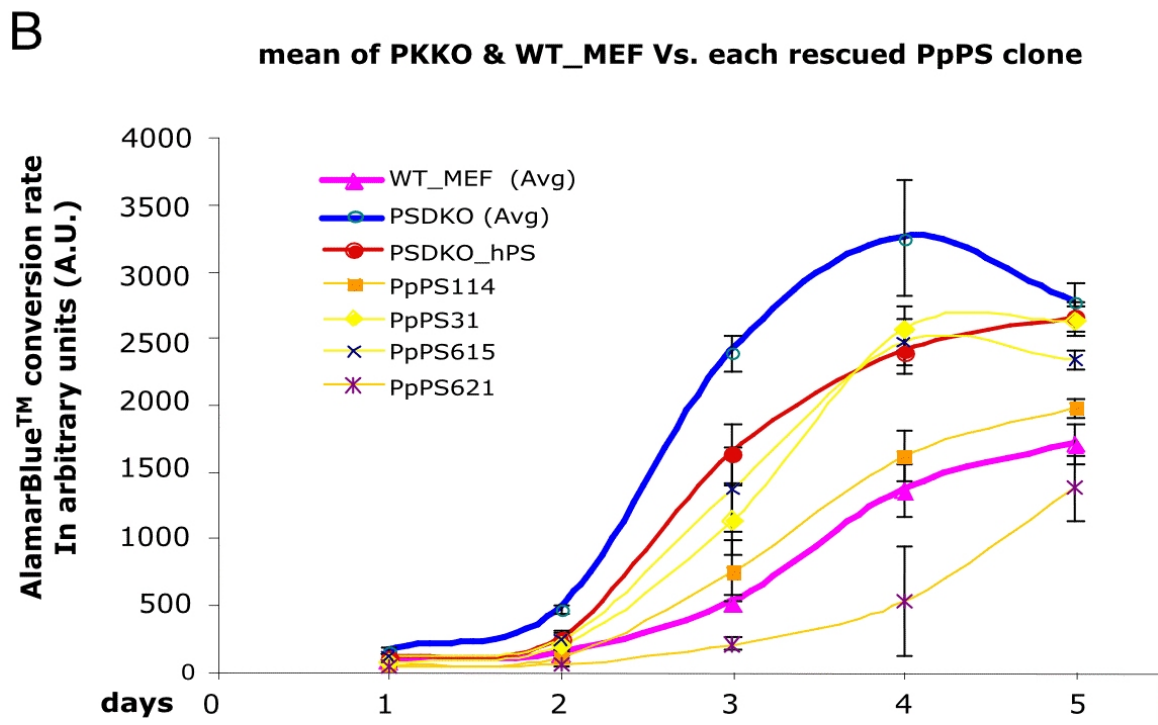

Supplement: pnas_0702038104_2.pdf [file pnas_0702038104_2.pdf]
